# Supplementary material
Source: Springer Nature journal article supplement (https://mijn.bsl.nl/resource/supplementary/13047_2013_566_MOESM5_ESM.pdf/7112404)

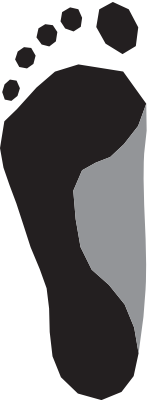

left

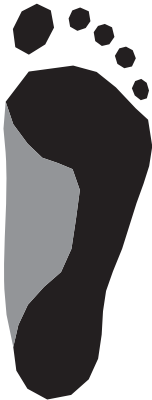

right

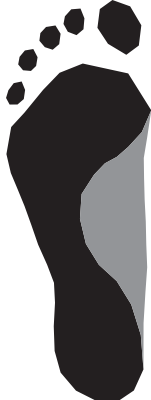

left x 3

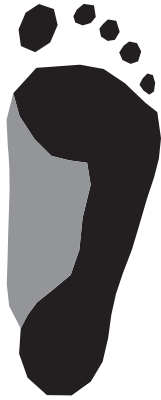

right x 3

Supplement: MOESM5 [file 7112404]
